# Supplementary material for: Self-disproportionation of enantiomers of thalidomide and its fluorinated analogue via gravity-driven achiral chromatography: mechanistic rationale and implications
Source: Royal Society of Chemistry journal article supplement (doi:10.1039/c4sc03047h), 2014-10-30

## **SUPPORTING INFORMATION**

### **Self-disproportionation of Enantiomers of Thalidomide and its Fluorinated Analogue via Gravity-driven Achiral Chromatography: Mechanistic Rationale and Implications**

**Mayaka Maeno, Etsuko Tokunaga, Takeshi Yamamoto, Toshiya Suzuki, Yoshiyuki Ogino, Emi  
Ito, Motoo Shiro, Toru Asahi\* and Norio Shibata\***

## General information

Silica-gel chromatographies were monitored by thin-layer chromatography (TLC) carried out on 0.25 mm Merck silica-gel (60-F254). The TLC plates were visualized with UV light (302 nm). The  $^1\text{H}$ -NMR (300 MHz),  $^{19}\text{F}$ -NMR (282 MHz) spectra for solution in  $\text{CDCl}_3$  were recorded on a Varian Mercury 300. Chemical shifts ( $\delta$ ) are expressed in ppm downfield from TMS or  $\text{CFCl}_3$ . Mass spectra were recorded on a SHIMADZU LCMS-2010EV. HPLC analyses were performed on a JASCO U-2080 Plus using 4.6 x 250 mm CHIRALCEL OJ-H column. Infrared spectra were recorded on a JASCO FT/IR-200 spectrometer. ( $\pm$ )-**1**<sup>[1]</sup>, ( $\pm$ )-**2**<sup>[2a, 2b]</sup>, (*R*)-**1**<sup>[3]</sup>, and (*R*)-**2**<sup>[4]</sup> were prepared according to previously reported procedures. Their enantiomeric mixtures were prepared using ( $\pm$ )-**1** 100 mg and (*R*)-**1** 50 mg or ( $\pm$ )-**2** 100 mg and (*R*)-**2** 50 mg.

### ( $\pm$ )-Thalidomide (**1**)

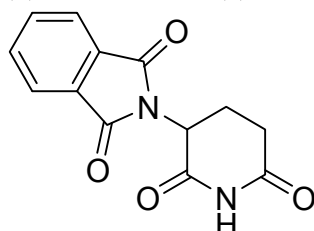

A white solid.  $^1\text{H}$  NMR (300 MHz,  $\text{CDCl}_3$ ):  $\delta$  7.97 (bs, 1H), 7.91-7.87 (m, 2H), 7.80-7.76 (m, 2H), 5.00 (dd,  $J$  = 12.2, 5.1 MHz, 1H), 2.95-2.75 (m, 3H), 2.19-2.14 (m, 1H); IR (KBr): 3195, 3098, 1772, 1710, 1387, 1327, 1259, 1209, 1114, 1091, 1019, 1001, 890, 859, 7278, 607  $\text{cm}^{-1}$ ; MS (ESI,  $m/z$ ) calculated for  $\text{C}_{13}\text{H}_{10}\text{N}_2\text{NaO}_4$  ( $[\text{M} + \text{Na}]^+$ ) 281.05, found 280.90

### (*R*)-Thalidomide (**1**)

A white solid. Spectral data for (*R*)-**1** ( $^1\text{H}$  NMR, IR, MS) corresponded to ( $\pm$ )-**1**. HPLC (DAICEL CHIRALCEL OJ-H, 4.6×250 mm, EtOH=100, flow rate 0.5 mL/min,  $\lambda$ =254 nm)  $t_R$  = 12.75 min (major).

### ( $\pm$ )-3'-Fluorothalidomide (**2**)

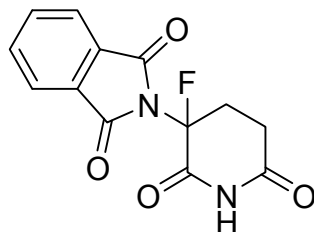

A white solid.  $^1\text{H}$  NMR (300 MHz,  $\text{CDCl}_3$ ):  $\delta$  8.07 (bs, 1H), 7.96-7.90 (m, 2H), 7.87-7.83 (m, 2H), 3.64-3.56 (m, 1H), 2.93-2.86 (m, 1H), 2.67-2.48 (m, 2H);  $^{19}\text{F}$  NMR (282 MHz,  $\text{CDCl}_3$ ):  $\delta$  -131.51 (s, 1F); IR (KBr): 3317, 3175, 3100, 1798, 1738, 1699, 1365, 1331, 1205, 1117, 1042, 873, 837, 715,  $\text{cm}^{-1}$ ; MS (ESI,  $m/z$ ) calculated for  $\text{C}_{13}\text{H}_9\text{FN}_2\text{NaO}_4$  ( $[\text{M} + \text{Na}]^+$ ) 299.04, found 298.95

### **(R)-3'-Fluorothalidomide (2)**

A white solid. Spectral data for (R)-**2** (<sup>1</sup>H NMR, <sup>19</sup>F NMR, IR, MS) corresponded to (±)-**2**. HPLC (DAICEL CHIRALCEL OJ-H, 4.6×250 mm, EtOH=100, flow rate 0.5 mL/min, λ=254 nm) *t*<sub>R</sub> = 12.49 min (major).

### **Typical purification experiment using a column chromatography with an achiral phase**

3 g of silica-gel (60N spherical neutral size 63-210 μm or 40-50μm) was packed in a 10 mm x 50 mm glass column with hexane and ethyl acetate as the eluent under atmospheric pressure at room temperature. In general, a solution of 10.0 mg of **1** or **2** dissolved in 0.15 mL of DMSO was loaded on this packed column following which this column was pressurized at the abovementioned pressure and 50-60 (each 2.0 mL) fractions were collected until no more **1** or **2** were detected by TLC analysis. Each fraction was then subjected to high-performance liquid chromatography (HPLC) analysis to determine enantiomeric excess (ee).

### **References**

- [1] G. W. Muller, W. E. Konnecke, A. M. Smith, V. D. Khetani, *Org. Process Res. Dev.* **1999**, *3*, 139-140.
- [2] a) Y. Takeuchi, T. Shiragami, K. Kimura, E. Suzuki, N. Shibata, *Org. Lett.* **1999**, *1*, 1571–1573; b) selectfluor<sup>®</sup> (1.5 equiv.) was used instead of FClO<sub>3</sub>.
- [3] E. Suzuki, N. Shibata, *Enantiomer* **2001**, *6*, 275-279.
- [4] T. Yamamoto, Y. Suzuki, E. Ito, E. Tokunaga, N. Shibata, *Org. Lett.* **2011**, *13*, 470-473.

HPLC chromatograms of (±)-**1** and (*R*)-**1**

DAICEL CHIRALCEL OJ-H, 4.6×250 mm, EtOH=100, flow rate 0.5 ml/min, λ=254 nm

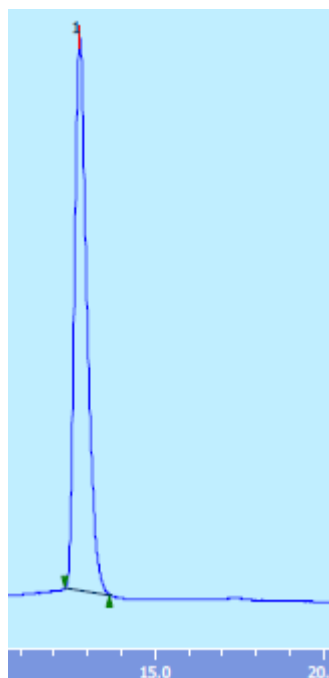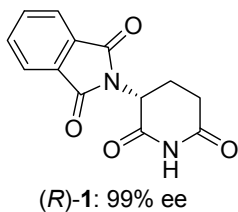

| PK No | Time   | Area% |
|-------|--------|-------|
| 1     | 12.750 | 100   |

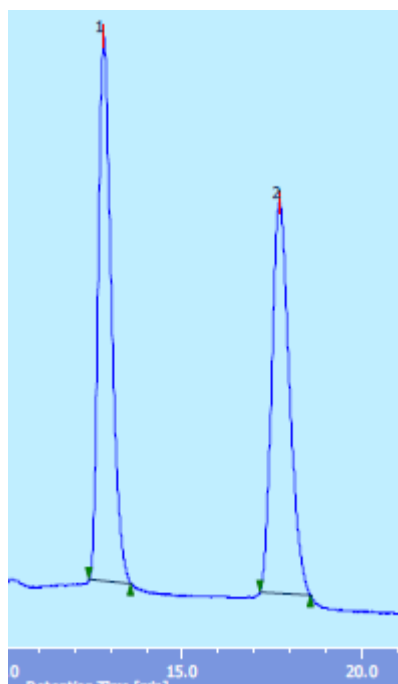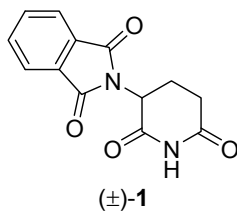

| PK No | Time   | Area%  |
|-------|--------|--------|
| 1     | 12.767 | 50.762 |
| 2     | 17.675 | 49.238 |

HPLC chromatograms of ( $\pm$ )-**2** and (*R*)-**2**

DAICEL CHIRALCEL OJ-H, 4.6 $\times$ 250 mm, EtOH=100, flow rate 0.5 ml/min,  $\lambda$ =254 nm

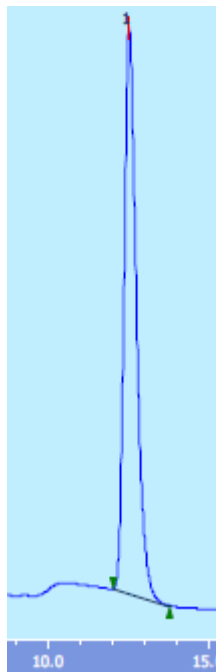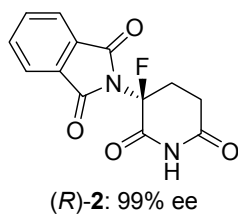

| PK No | Time   | Area% |
|-------|--------|-------|
| 1     | 12.492 | 100   |

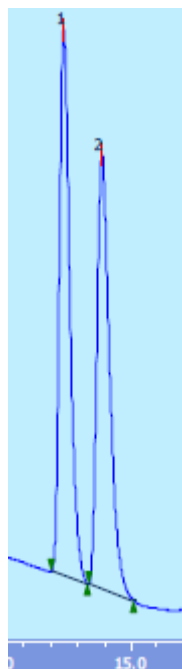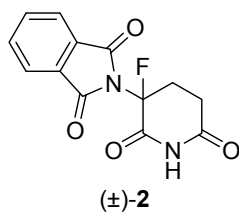

| PK No | Time   | Area%  |
|-------|--------|--------|
| 1     | 12.475 | 50.719 |
| 2     | 13.908 | 49.281 |

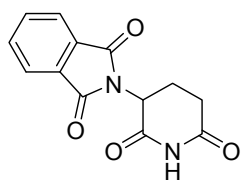

(±)-**1**  
<sup>1</sup>H NMR CDCl<sub>3</sub>

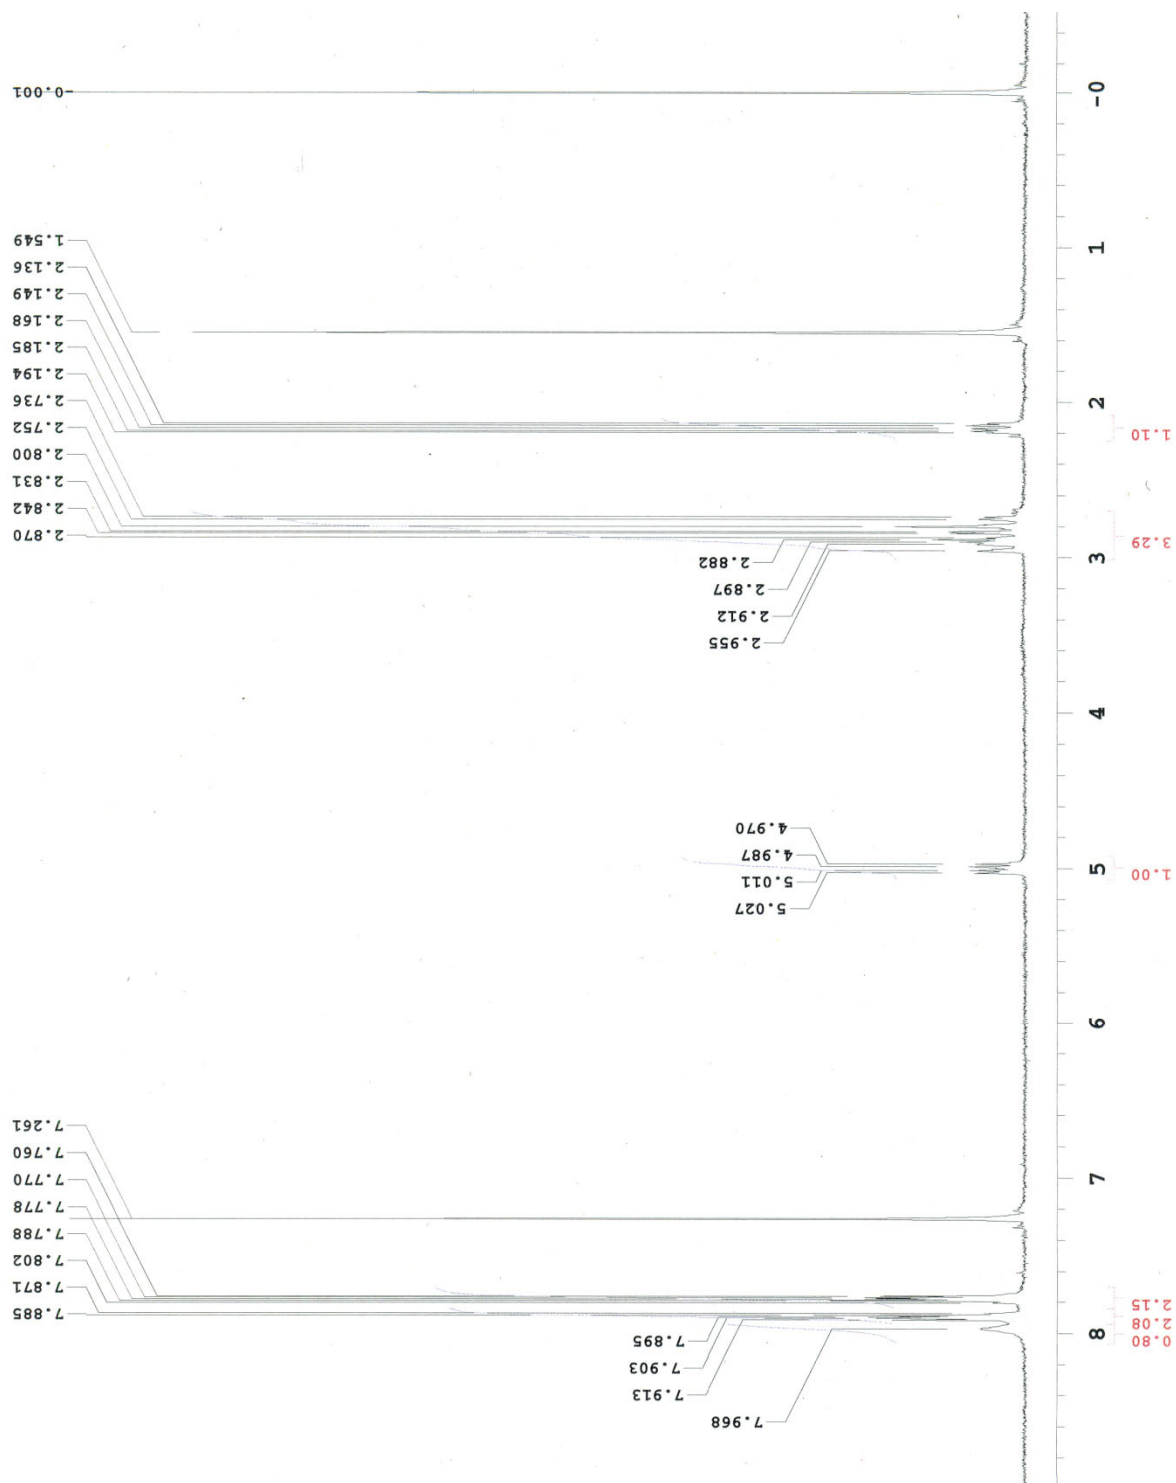

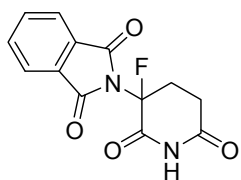

(±)-2  
<sup>1</sup>H NMR CDCl<sub>3</sub>

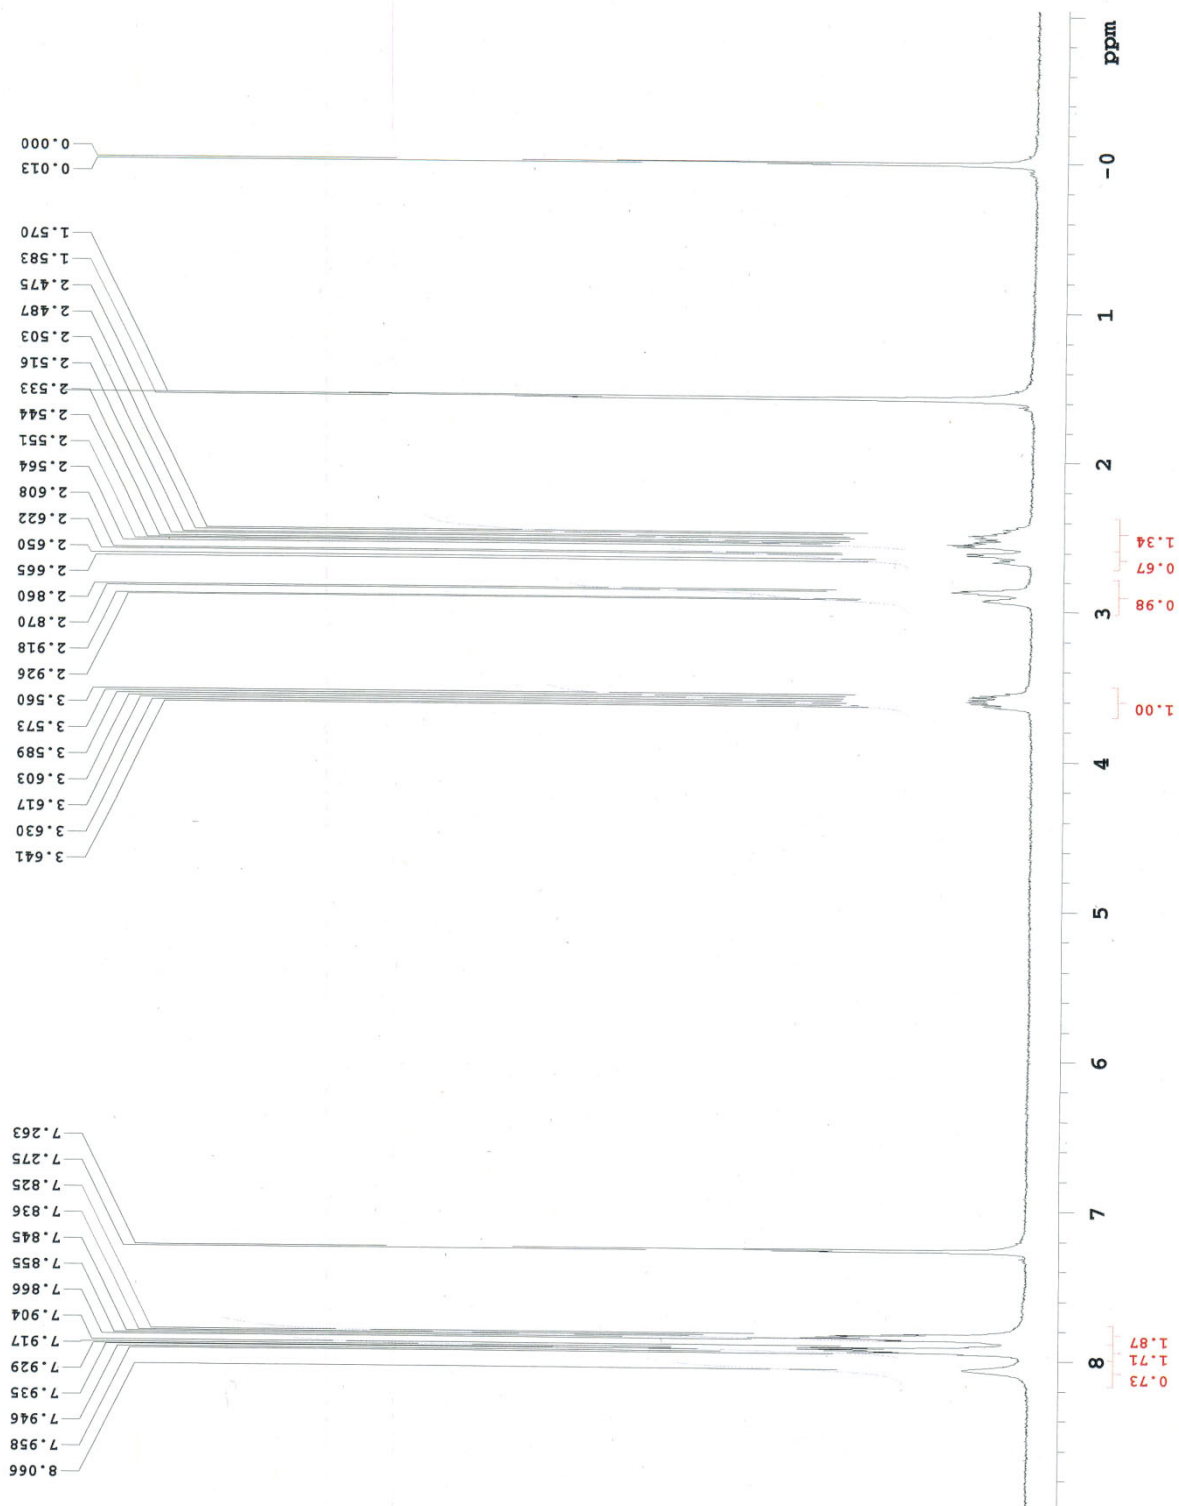

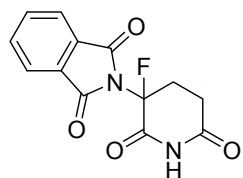

(±)-2  
<sup>19</sup>F NMR CDCl<sub>3</sub>

-131.509

0.000

ppm

-120

-100

-80

-60

-40

-20

0



IR (KBr) spectra of (±)-**1**

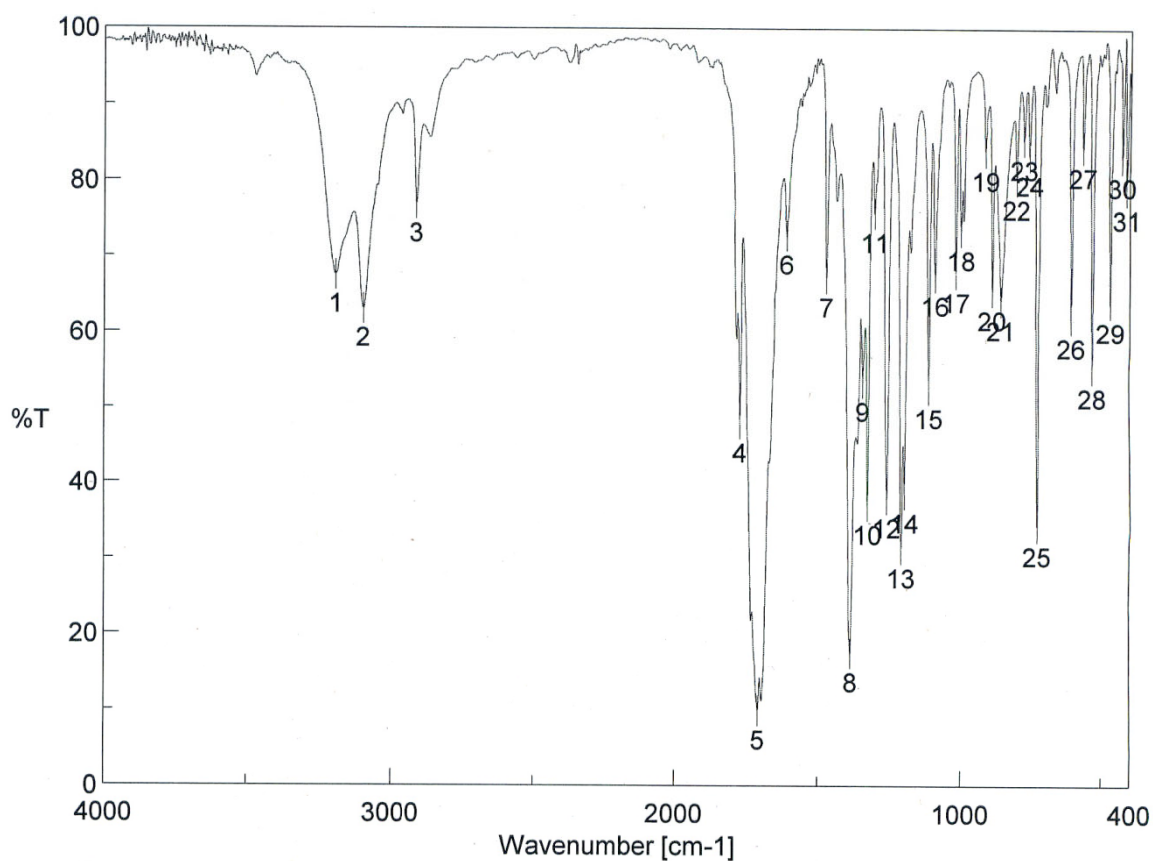

ESI MS spectra of (±)-**1**

calculated for C<sub>13</sub>H<sub>10</sub>N<sub>2</sub>NaO<sub>4</sub> ([M + Na]<sup>+</sup>) 281.05, found 280.90

保持時間:0.383(スキャン#:24)  
 ピーク数:439 ベースピーク:280.90(561095)  
 スペクトル:シングル 0.383(24)  
 バックグラウンド:なし 極性:ポジティブ セグメント1 - イベント1

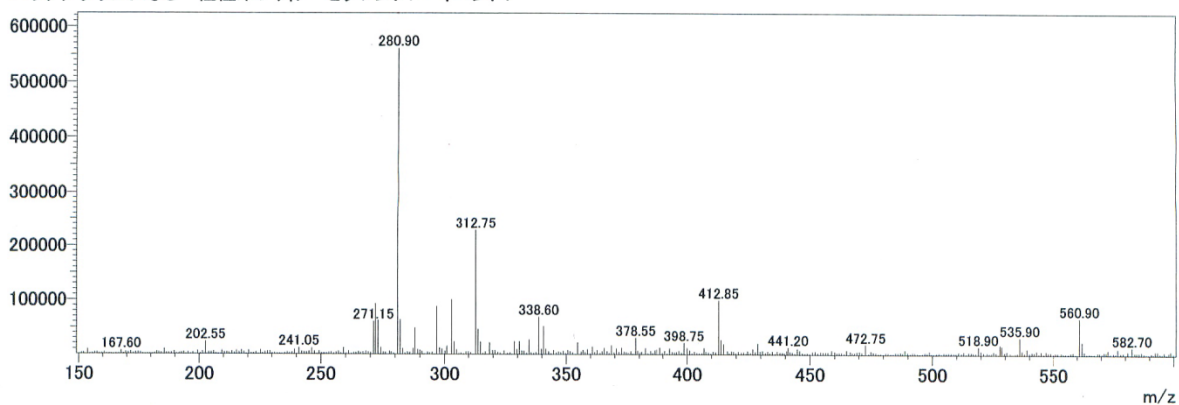

IR (KBr) spectra of (±)-**2**

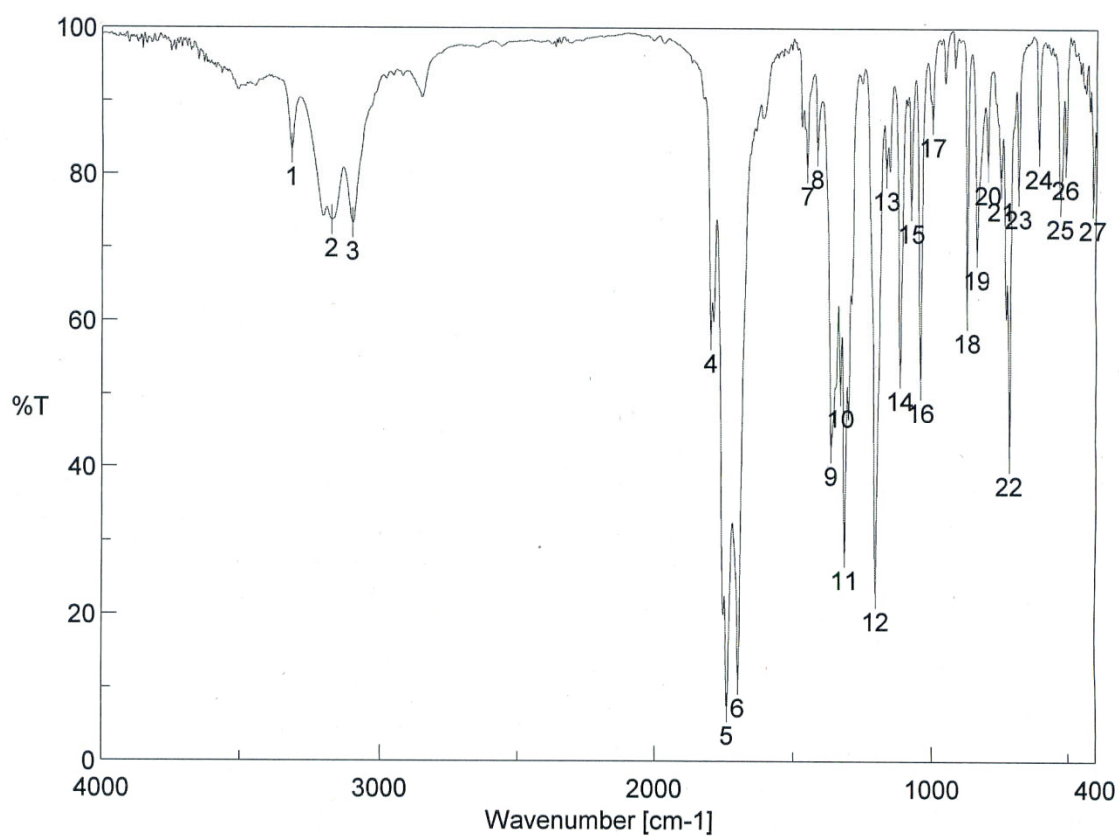

ESI MS spectra of (±)-**2**

calculated for C<sub>13</sub>H<sub>9</sub>FN<sub>2</sub>NaO<sub>4</sub> ([M + Na]<sup>+</sup>) 299.04, found 298.95

保持時間:0.367(スキャン#:23)  
 ピーク数:451 ベースピーク:298.80(402883)  
 スペクトル:平均 0.267-0.467(17-29)  
 バックグラウンド:なし 極性:ポジティブ セグメント1 - イベント1

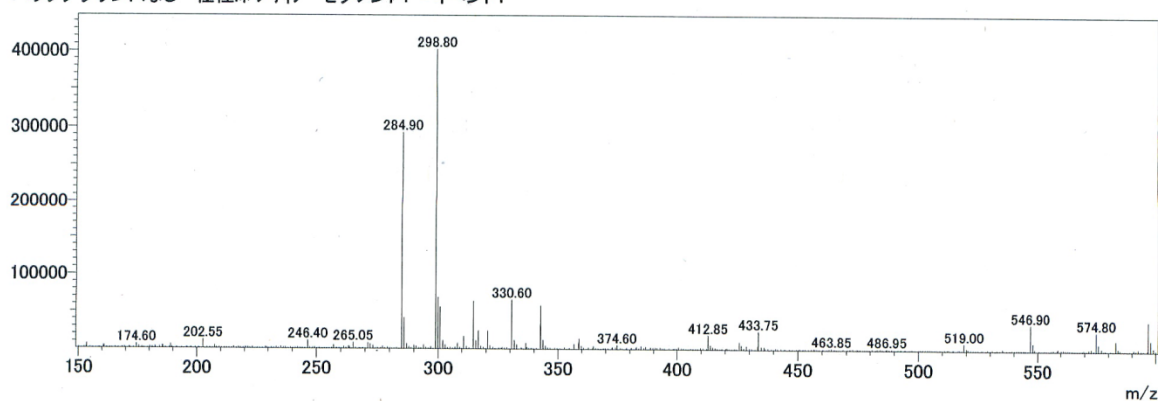

Supplement: c4sc03047h1.pdf [file c4sc03047h1.pdf]
